# Supplementary material for: COVID-19 Vaccine Refusal and Delay among Adults in Italy: Evidence from the OBVIOUS Project, a National Survey in Italy
Source: Vaccines (Basel). 2023 Apr 13;11(4):839. doi: 10.3390/vaccines11040839 (PMC10141216; doi:10.3390/vaccines11040839)
Supplement: Supplementary file 1 [file vaccines-11-00839-s001.zip › vaccines-2298245-supplementary.pdf]

## SUPPLEMENTARY MATERIAL

**Table S1.** Resident adult population of Italy by NUTS statistical region, gender, and age group at January 1, 2022 ( $n = 49\,783\,836$ ).

| Age group | Northwestern Italy |           | Northeastern Italy |           | Central Italy |           | Southern Italy |           | Insular Italy |         |
|-----------|--------------------|-----------|--------------------|-----------|---------------|-----------|----------------|-----------|---------------|---------|
|           | Male               | Female    | Male               | Female    | Male          | Female    | Male           | Female    | Male          | Female  |
| 18–24 y   | 553 033            | 505 245   | 409 914            | 374 523   | 402 087       | 368 995   | 532 647        | 494 803   | 239 009       | 220 219 |
| 25–34 y   | 836 151            | 791 227   | 613 449            | 576 453   | 611 746       | 580 657   | 779 592        | 755 610   | 355 025       | 344 717 |
| 35–44 y   | 969 032            | 951 652   | 703 399            | 695 075   | 727 507       | 735 948   | 844 648        | 850 252   | 395 793       | 398 899 |
| 45–54 y   | 1 283 458          | 1 277 029 | 941 466            | 938 983   | 930 711       | 976 955   | 1 001 115      | 1 046 563 | 482 219       | 499 758 |
| 55–64 y   | 1 157 096          | 1 199 031 | 852 267            | 879 622   | 844 991       | 908 707   | 941 859        | 1 015 616 | 453 686       | 489 038 |
| ≥65 y     | 1 687 998          | 2 201 703 | 1 221 291          | 1 561 980 | 1 250 238     | 1 623 659 | 1 331 520      | 1 673 237 | 658 804       | 835 929 |

*Source:* Italian National Institute of Statistics (Istat).

*Notes:* Northwestern Italy includes the regions of Piedmont, Aosta Valley, Lombardy, and Liguria; Northeastern Italy includes the regions of Trentino-South Tyrol, Veneto, Friuli-Venezia Giulia, and Emilia-Romagna; Central Italy includes the regions of Tuscany, Umbria, Marche, and Lazio; Southern Italy includes the regions of Abruzzo, Molise, Campania, Apulia, Basilicata, and Calabria; Insular Italy includes the regions of Sicily and Sardinia.

**Table S2.** Relative distribution of the OBVIOUS sample ( $n = 10\,000$ ) and Italy's adult population at January 1, 2022 ( $n = 49\,783\,836$ ) by NUTS statistical region, gender, and age group. Discrepancies between observed weights and expected weights to be obtained via stratified sampling are quantified as the difference between the relative contributions of each stratum in the study sample vs. the target population.

|                                        | Northwestern Italy |          | Northeastern Italy |          | Central Italy |          | Southern Italy |          | Insular Italy |          |
|----------------------------------------|--------------------|----------|--------------------|----------|---------------|----------|----------------|----------|---------------|----------|
|                                        | Male               | Female*  | Male               | Female*  | Male          | Female*  | Male           | Female*  | Male          | Female*  |
| Study sample ( <i>Observed</i> )       |                    |          |                    |          |               |          |                |          |               |          |
| 18–24 y                                | 0.00850            | 0.01140  | 0.01000            | 0.01030  | 0.00910       | 0.01020  | 0.01440        | 0.01510  | 0.00440       | 0.00470  |
| 25–34 y                                | 0.01530            | 0.02040  | 0.01570            | 0.01950  | 0.01500       | 0.01920  | 0.02560        | 0.02040  | 0.00670       | 0.01190  |
| 35–44 y                                | 0.02830            | 0.03400  | 0.01760            | 0.02100  | 0.01980       | 0.02170  | 0.02510        | 0.02500  | 0.01070       | 0.01620  |
| 45–54 y                                | 0.02990            | 0.03120  | 0.01590            | 0.01990  | 0.01960       | 0.02100  | 0.01900        | 0.02340  | 0.00950       | 0.01440  |
| 55–64 y                                | 0.02470            | 0.02650  | 0.01240            | 0.01600  | 0.01870       | 0.02000  | 0.01390        | 0.01650  | 0.00750       | 0.00950  |
| ≥65 y                                  | 0.02400            | 0.02080  | 0.01790            | 0.00990  | 0.01540       | 0.01060  | 0.01810        | 0.01300  | 0.00690       | 0.00670  |
| Italian population ( <i>Expected</i> ) |                    |          |                    |          |               |          |                |          |               |          |
| 18–24 y                                | 0.01111            | 0.01015  | 0.00823            | 0.00752  | 0.00808       | 0.00741  | 0.01070        | 0.00994  | 0.00480       | 0.00442  |
| 25–34 y                                | 0.01680            | 0.01589  | 0.01232            | 0.01158  | 0.01229       | 0.01166  | 0.01566        | 0.01518  | 0.00713       | 0.00692  |
| 35–44 y                                | 0.01946            | 0.01912  | 0.01413            | 0.01396  | 0.01461       | 0.01478  | 0.01697        | 0.01708  | 0.00795       | 0.00801  |
| 45–54 y                                | 0.02578            | 0.02565  | 0.01891            | 0.01886  | 0.01870       | 0.01962  | 0.02011        | 0.02102  | 0.00969       | 0.01004  |
| 55–64 y                                | 0.02324            | 0.02408  | 0.01712            | 0.01767  | 0.01697       | 0.01825  | 0.01892        | 0.02040  | 0.00911       | 0.00982  |
| ≥65 y                                  | 0.03391            | 0.04423  | 0.02453            | 0.03138  | 0.02511       | 0.03261  | 0.02675        | 0.03361  | 0.01323       | 0.01679  |
| O–E difference                         |                    |          |                    |          |               |          |                |          |               |          |
| 18–24 y                                | –0.00261           | 0.00125  | 0.00177            | 0.00278  | 0.00102       | 0.00279  | 0.00370        | 0.00516  | –0.00040      | 0.00028  |
| 25–34 y                                | –0.00150           | 0.00451  | 0.00338            | 0.00792  | 0.00271       | 0.00754  | 0.00994        | 0.00522  | –0.00043      | 0.00498  |
| 35–44 y                                | 0.00884            | 0.01488  | 0.00347            | 0.00704  | 0.00519       | 0.00692  | 0.00813        | 0.00792  | 0.00275       | 0.00819  |
| 45–54 y                                | 0.00412            | 0.00555  | –0.00301           | 0.00104  | 0.00090       | 0.00138  | –0.00111       | 0.00238  | –0.00019      | 0.00436  |
| 55–64 y                                | 0.00146            | 0.00242  | –0.00472           | –0.00167 | 0.00173       | 0.00175  | –0.00502       | –0.00390 | –0.00161      | –0.00032 |
| ≥65 y                                  | –0.00991           | –0.02343 | –0.00663           | –0.02148 | –0.00971      | –0.02201 | –0.00865       | –0.02061 | –0.00633      | –0.01009 |

\*Including non-binary individuals and respondents who preferred not to disclose their gender (24 out of 10 000).

*Notes:* Northwestern Italy includes the regions of Piedmont, Aosta Valley, Lombardy, and Liguria; Northeastern Italy includes the regions of Trentino-South Tyrol, Veneto, Friuli-Venezia Giulia, and Emilia-Romagna; Central Italy includes the regions of Tuscany, Umbria, Marche, and Lazio; Southern Italy includes the regions of Abruzzo, Molise, Campania, Apulia, Basilicata, and Calabria; Insular Italy includes the regions of Sicily and Sardinia.

OBVIOUS, Observatory on Vaccine Hesitancy in Italy - Online UNIBO Surveys.

**Table S3.** Sociodemographic characteristics of the study sample, overall and by COVID-19 vaccine uptake status. Counts and percentages are unweighted, that is, not adjusted via post-stratification.

| Characteristic                                                                                                                          | All<br>( <i>n</i> = 10 000) | Got It as Soon<br>as Possible<br>( <i>n</i> = 8202) | Put Off Getting<br>It<br>( <i>n</i> = 897) | Refused to Get<br>It<br>( <i>n</i> = 687) | Vaccine-Exempt<br>( <i>n</i> = 214) | <i>P</i> -Value |
|-----------------------------------------------------------------------------------------------------------------------------------------|-----------------------------|-----------------------------------------------------|--------------------------------------------|-------------------------------------------|-------------------------------------|-----------------|
| Gender                                                                                                                                  |                             |                                                     |                                            |                                           |                                     | <0.001          |
| Male                                                                                                                                    | 4796 (100.0%)               | 3981 (83.0%)                                        | 391 (8.2%)                                 | 285 (5.9%) <sup>(-)</sup>                 | 139 (2.9%) <sup>(+)</sup>           |                 |
| Female                                                                                                                                  | 5180 (100.0%)               | 4204 (81.2%)                                        | 504 (9.7%)                                 | 398 (7.7%) <sup>(+)</sup>                 | 74 (1.4%) <sup>(-)</sup>            |                 |
| Non-binary                                                                                                                              | 17 (100.0%)                 | 12 (70.6%)                                          | 1 (5.9%)                                   | 4 (23.5%)                                 | 0 (0.0%)                            |                 |
| Prefer not to say                                                                                                                       | 7 (100.0%)                  | 5 (71.4%)                                           | 1 (14.3%)                                  | 0 (0.0%)                                  | 1 (14.3%)                           |                 |
| Age group, y                                                                                                                            |                             |                                                     |                                            |                                           |                                     | <0.001          |
| 18–24                                                                                                                                   | 981 (100.0%)                | 848 (86.4%) <sup>(+)</sup>                          | 72 (7.3%)                                  | 35 (3.6%) <sup>(-)</sup>                  | 26 (2.7%)                           |                 |
| 25–34                                                                                                                                   | 1697 (100.0%)               | 1349 (79.5%)                                        | 209 (12.3%) <sup>(+)</sup>                 | 96 (5.7%)                                 | 43 (2.5%)                           |                 |
| 35–44                                                                                                                                   | 2194 (100.0%)               | 1692 (77.1%) <sup>(-)</sup>                         | 245 (11.2%) <sup>(+)</sup>                 | 194 (8.8%) <sup>(+)</sup>                 | 63 (2.9%)                           |                 |
| 45–54                                                                                                                                   | 2038 (100.0%)               | 1652 (81.1%)                                        | 180 (8.8%)                                 | 173 (8.5%)                                | 33 (1.6%)                           |                 |
| 55–64                                                                                                                                   | 1657 (100.0%)               | 1410 (85.1%) <sup>(+)</sup>                         | 132 (8.0%)                                 | 97 (5.9%)                                 | 18 (1.1%)                           |                 |
| ≥65                                                                                                                                     | 1433 (100.0%)               | 1251 (87.3%) <sup>(+)</sup>                         | 59 (4.1%) <sup>(-)</sup>                   | 92 (6.4%)                                 | 31 (2.2%)                           |                 |
| Place of Residence Degree of Urbanization                                                                                               |                             |                                                     |                                            |                                           |                                     | <0.001          |
| City (densely populated area)                                                                                                           | 3881 (100.0%)               | 3247 (83.7%) <sup>(+)</sup>                         | 319 (8.2%)                                 | 249 (6.4%)                                | 66 (1.7%)                           |                 |
| Town or suburb (intermediate density area)                                                                                              | 4685 (100.0%)               | 3868 (82.6%)                                        | 410 (8.8%)                                 | 338 (7.2%)                                | 69 (1.5%) <sup>(-)</sup>            |                 |
| Rural area (thinly populated area)                                                                                                      | 1434 (100.0%)               | 1087 (75.8%) <sup>(-)</sup>                         | 168 (11.7%) <sup>(+)</sup>                 | 100 (7.0%)                                | 79 (5.5%) <sup>(+)</sup>            |                 |
| Educational attainment                                                                                                                  |                             |                                                     |                                            |                                           |                                     | <0.001          |
| Less than high school diploma                                                                                                           | 1341 (100.0%)               | 1080 (80.5%)                                        | 119 (8.9%)                                 | 131 (9.8%) <sup>(+)</sup>                 | 11 (0.8%) <sup>(-)</sup>            |                 |
| High school diploma                                                                                                                     | 5714 (100.0%)               | 4692 (82.1%)                                        | 521 (9.1%)                                 | 412 (7.2%)                                | 89 (1.6%) <sup>(-)</sup>            |                 |
| Academic degree                                                                                                                         | 2119 (100.0%)               | 1817 (85.7%) <sup>(+)</sup>                         | 155 (7.3%)                                 | 107 (5.0%) <sup>(-)</sup>                 | 40 (1.9%)                           |                 |
| Post-graduate/Doctorate degree                                                                                                          | 826 (100.0%)                | 613 (74.2%) <sup>(-)</sup>                          | 102 (12.3%) <sup>(+)</sup>                 | 37 (4.5%)                                 | 74 (9.0%) <sup>(+)</sup>            |                 |
| Opinion on vaccination policies                                                                                                         |                             |                                                     |                                            |                                           |                                     | <0.001          |
| Governments should restrict themselves to making vaccines available and providing information, without influencing individual decisions | 3720 (100.0%)               | 2495 (67.1%) <sup>(-)</sup>                         | 547 (14.7%) <sup>(+)</sup>                 | 556 (14.9%) <sup>(+)</sup>                | 122 (3.3%) <sup>(+)</sup>           |                 |
| Governments must make vaccines mandatory during health emergencies                                                                      | 3432 (100.0%)               | 3320 (96.7%) <sup>(+)</sup>                         | 82 (2.4%) <sup>(-)</sup>                   | 19 (0.6%) <sup>(-)</sup>                  | 11 (0.3%) <sup>(-)</sup>            |                 |
| Governments must offer incentives to those who get vaccinated, but without imposing any vaccine mandate                                 | 2089 (100.0%)               | 1692 (81.0%)                                        | 232 (11.1%) <sup>(+)</sup>                 | 98 (4.7%) <sup>(-)</sup>                  | 67 (3.2%) <sup>(+)</sup>            |                 |
| Governments must use penalties for those who decide not to get vaccinated                                                               | 759 (100.0%)                | 695 (91.6%) <sup>(+)</sup>                          | 36 (4.7%) <sup>(-)</sup>                   | 14 (1.8%) <sup>(-)</sup>                  | 14 (1.8%)                           |                 |
| Use of homeopathy, naturopathy, chiropractic or osteopathy as the main source of care                                                   |                             |                                                     |                                            |                                           |                                     | <0.001          |

|                                                                |               |                             |                            |                            |                           |        |
|----------------------------------------------------------------|---------------|-----------------------------|----------------------------|----------------------------|---------------------------|--------|
| Yes                                                            | 1502 (100.0%) | 956 (63.6%) <sup>(-)</sup>  | 245 (16.3%) <sup>(+)</sup> | 193 (12.8%) <sup>(+)</sup> | 108 (7.2%) <sup>(+)</sup> | <0.001 |
| No                                                             | 8498 (100.0%) | 7246 (85.3%) <sup>(+)</sup> | 652 (7.7%) <sup>(-)</sup>  | 494 (5.8%) <sup>(-)</sup>  | 106 (1.2%) <sup>(-)</sup> |        |
| Visit to one of the following practitioners over the last year |               |                             |                            |                            |                           |        |
| Osteopath                                                      | 808 (100.0%)  | 655 (81.1%)                 | 91 (11.3%)                 | 37 (4.6%)                  | 25 (3.1%)                 | <0.001 |
| Homeopath                                                      | 414 (100.0%)  | 259 (62.6%) <sup>(-)</sup>  | 74 (17.9%) <sup>(+)</sup>  | 43 (10.4%)                 | 38 (9.2%) <sup>(+)</sup>  |        |
| Naturopath                                                     | 255 (100.0%)  | 153 (60.0%) <sup>(-)</sup>  | 46 (18.0%) <sup>(+)</sup>  | 28 (11.0%)                 | 28 (11.0%) <sup>(+)</sup> |        |
| Chiropractor                                                   | 232 (100.0%)  | 158 (68.1%) <sup>(-)</sup>  | 34 (14.7%)                 | 15 (6.5%)                  | 25 (10.8%) <sup>(+)</sup> |        |
| None of the above                                              | 8291 (100.0%) | 6977 (84.2%) <sup>(+)</sup> | 652 (7.9%) <sup>(-)</sup>  | 564 (6.8%)                 | 98 (1.2%) <sup>(-)</sup>  |        |
| Use of one of the following products over the last year        |               |                             |                            |                            |                           |        |
| Supplements (e.g., proteins, vitamins, minerals)               | 5298 (100.0%) | 4391 (82.9%)                | 451 (8.5%)                 | 378 (7.1%)                 | 78 (1.5%) <sup>(-)</sup>  | <0.001 |
| Herbal remedies                                                | 799 (100.0%)  | 599 (75.0%) <sup>(-)</sup>  | 105 (13.1%) <sup>(+)</sup> | 64 (8.0%)                  | 31 (3.9%) <sup>(+)</sup>  |        |
| Homeopathic products                                           | 450 (100.0%)  | 296 (65.8%) <sup>(-)</sup>  | 78 (17.3%) <sup>(+)</sup>  | 38 (8.4%)                  | 38 (8.4%) <sup>(+)</sup>  |        |
| Aromatherapy (e.g., essential oils)                            | 270 (100.0%)  | 174 (64.4%) <sup>(-)</sup>  | 42 (15.6%) <sup>(+)</sup>  | 23 (8.5%)                  | 31 (11.5%) <sup>(+)</sup> |        |
| None of the above                                              | 3183 (100.0%) | 2742 (86.1%) <sup>(+)</sup> | 221 (6.9%) <sup>(-)</sup>  | 184 (5.8%)                 | 36 (1.1%) <sup>(-)</sup>  |        |

<sup>(+)</sup>Adjusted residual  $\geq 3.29$  ( $\geq Z_{0.001/2}$ ), that is, frequency is significantly greater than what would be expected if the null hypothesis of independence was true.

<sup>(-)</sup>Adjusted residual  $\leq -3.29$  ( $\leq -Z_{0.001/2}$ ), that is, frequency is significantly lower than what would be expected if the null hypothesis of independence was true.

COVID-19, coronavirus disease 2019.

**Table S4.** Reasons for getting COVID-19 vaccination as soon as possible, putting off getting it, and refusing to get it. Counts and percentages are unweighted, that is, not adjusted via post-stratification.

| Answer                                     | All           | Importance Ranking |                 |                 |                  |
|--------------------------------------------|---------------|--------------------|-----------------|-----------------|------------------|
|                                            |               | 1 <sup>st</sup>    | 2 <sup>nd</sup> | 3 <sup>rd</sup> | >3 <sup>rd</sup> |
| Got it as soon as possible                 |               |                    |                 |                 |                  |
| Avoiding severe illness                    | 8202 (100.0%) | 4320 (52.7%)       | 962 (11.7%)     | 717 (8.7%)      | 2203 (26.9%)     |
| Protecting dear ones                       | 8202 (100.0%) | 1760 (21.5%)       | 2963 (36.1%)    | 1001 (12.2%)    | 2478 (30.2%)     |
| Sense of civic duty                        | 8202 (100.0%) | 991 (12.1%)        | 1321 (16.1%)    | 1946 (23.7%)    | 3944 (48.1%)     |
| Returning to normal life                   | 8202 (100.0%) | 814 (9.9%)         | 744 (9.1%)      | 1704 (20.8%)    | 4940 (60.2%)     |
| Professional ethics                        | 8202 (100.0%) | 317 (3.9%)         | 343 (4.2%)      | 514 (6.3%)      | 7028 (85.7%)     |
| Put off getting it                         |               |                    |                 |                 |                  |
| Fear of side effects                       | 897 (100.0%)  | 487 (54.3%)        | 107 (11.9%)     | 44 (4.9%)       | 259 (28.9%)      |
| Getting more info about safety             | 897 (100.0%)  | 239 (26.6%)        | 267 (29.8%)     | 55 (6.1%)       | 336 (37.5%)      |
| Lack of time and/or difficulties of access | 897 (100.0%)  | 83 (9.3%)          | 42 (4.7%)       | 76 (8.5%)       | 696 (77.6%)      |
| Opposition to vaccines in general          | 897 (100.0%)  | 45 (5.0%)          | 74 (8.2%)       | 76 (8.5%)       | 702 (78.3%)      |
| COVID-19 is not a serious disease          | 897 (100.0%)  | 28 (3.1%)          | 53 (5.9%)       | 85 (9.5%)       | 731 (81.5%)      |
| Protest against government                 | 897 (100.0%)  | 15 (1.7%)          | 22 (2.5%)       | 48 (5.4%)       | 812 (90.5%)      |
| Refused to get it                          |               |                    |                 |                 |                  |
| Fear of side effects                       | 687 (100.0%)  | 384 (55.9%)        | 106 (15.4%)     | 44 (6.4%)       | 153 (22.3%)      |
| Lack of information about safety           | 687 (100.0%)  | 183 (26.6%)        | 256 (37.3%)     | 48 (7.0%)       | 200 (29.1%)      |
| COVID-19 is not a serious disease          | 687 (100.0%)  | 46 (6.7%)          | 29 (4.2%)       | 99 (14.4%)      | 513 (74.7%)      |
| Opposition to vaccines in general          | 687 (100.0%)  | 31 (4.5%)          | 29 (4.2%)       | 56 (8.2%)       | 571 (83.1%)      |
| Fear of needles and/or doctors             | 687 (100.0%)  | 25 (3.6%)          | 17 (2.5%)       | 15 (2.2%)       | 630 (91.7%)      |
| Protest against government                 | 687 (100.0%)  | 18 (2.6%)          | 27 (3.9%)       | 64 (9.3%)       | 578 (84.1%)      |

Notes: Respondents were asked to pick three reasons in order of importance.

COVID-19, coronavirus disease 2019.

**Figure S1.** COVID-19 vaccine uptake in the study sample ( $n = 10\,000$ ) between January 2021 and April/May 2022, overall and by NUTS statistical region. Percentages are unweighted, that is, not adjusted via post-stratification.

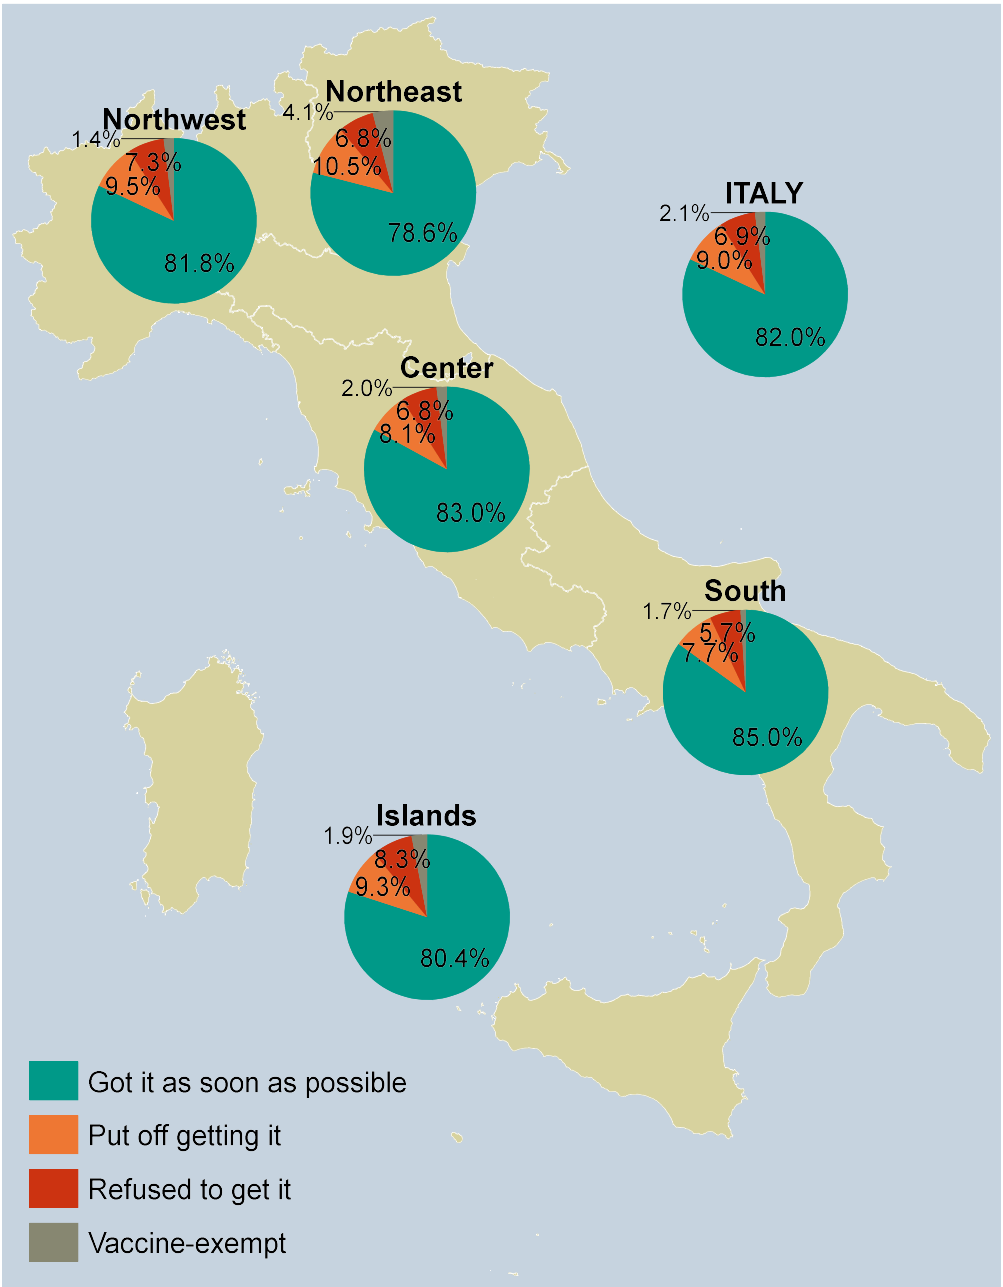

*Notes:* Northwestern Italy includes Piedmont, Aosta Valley, Lombardy, and Liguria; Northeastern Italy includes Trentino-South Tyrol, Veneto, Friuli-Venezia Giulia, and Emilia-Romagna; Central Italy includes Tuscany, Umbria, Marche, and Lazio; Southern Italy includes Abruzzo, Molise, Campania, Apulia, Basilicata, and Calabria; Insular Italy includes Sicily and Sardinia.

COVID-19, coronavirus disease 2019.

**Figure S2.** Trust in science scored on a scale from a minimum of 1 to a maximum of 10, by COVID-19 vaccine uptake status. Percentages are unweighted, that is, not adjusted via post-stratification.

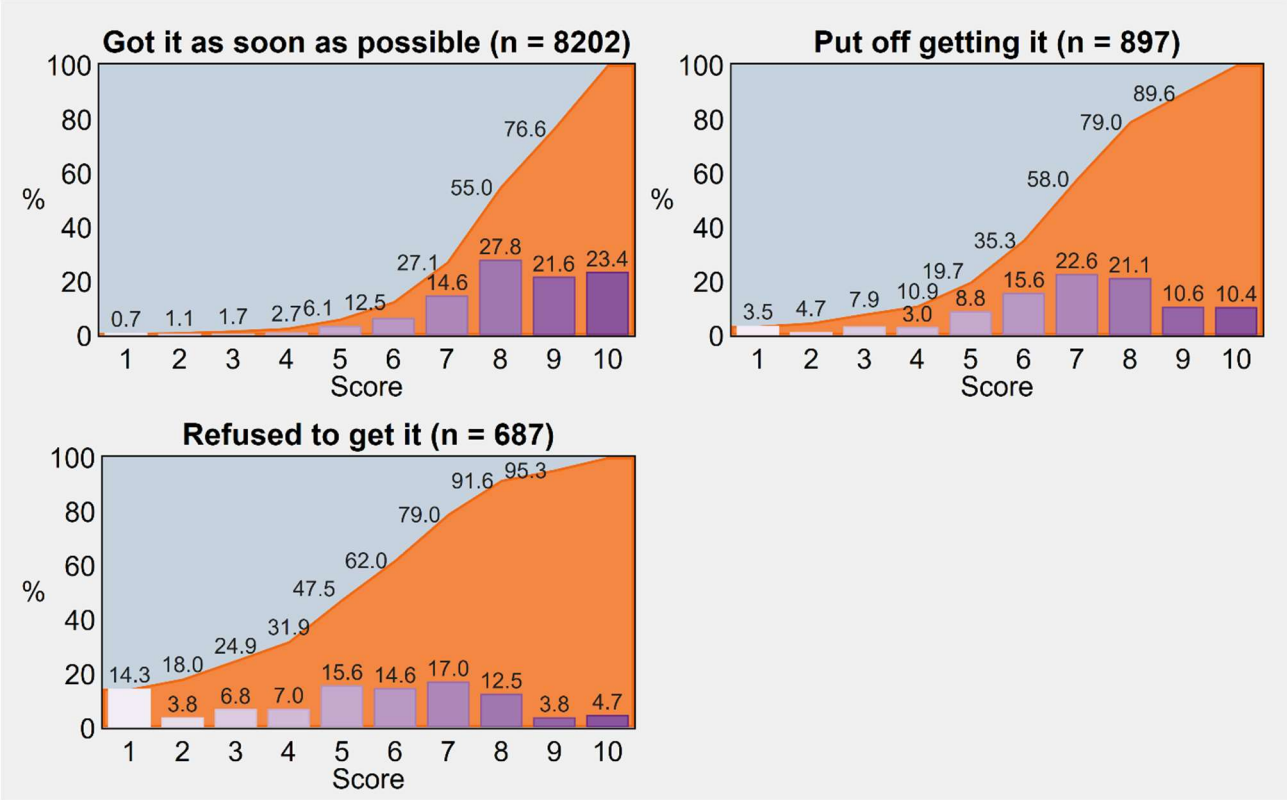

Notes: Cumulative frequencies are displayed with the aid of area charts in the background. Trust among vaccine-exempt individuals is not displayed due to small numbers (*n* = 214). COVID-19, coronavirus disease 2019.

**Figure S3.** Trust in the Italian government scored on a scale from a minimum of 1 to a maximum of 10, by COVID-19 vaccine uptake status. Percentages are unweighted, that is, not adjusted via post-stratification.

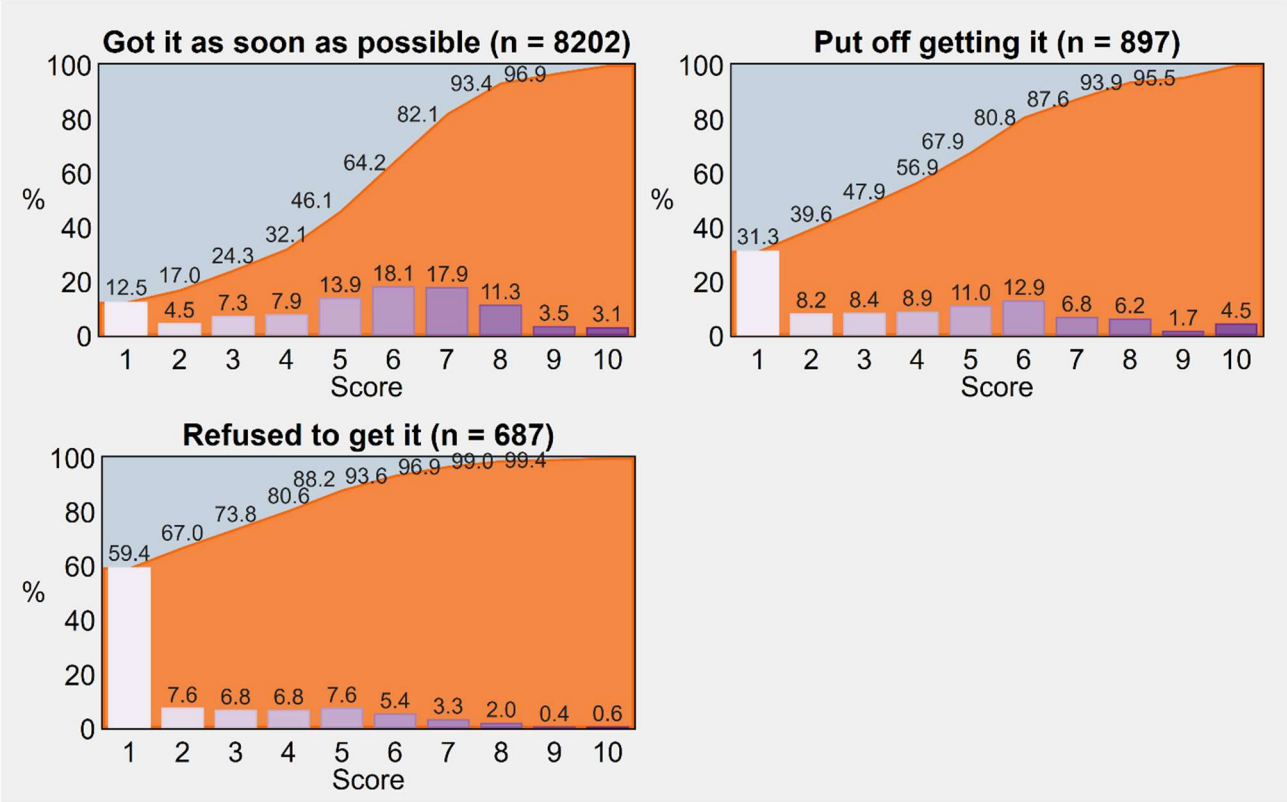

Notes: Cumulative frequencies are displayed with the aid of area charts in the background. Trust among vaccine-exempt individuals is not displayed due to small numbers ( $n = 214$ ). COVID-19, coronavirus disease 2019.

**Figure S4.** Voting intention as of April/May 2022 by COVID-19 vaccine uptake status. Percentages are unweighted, that is, not adjusted via post-stratification.

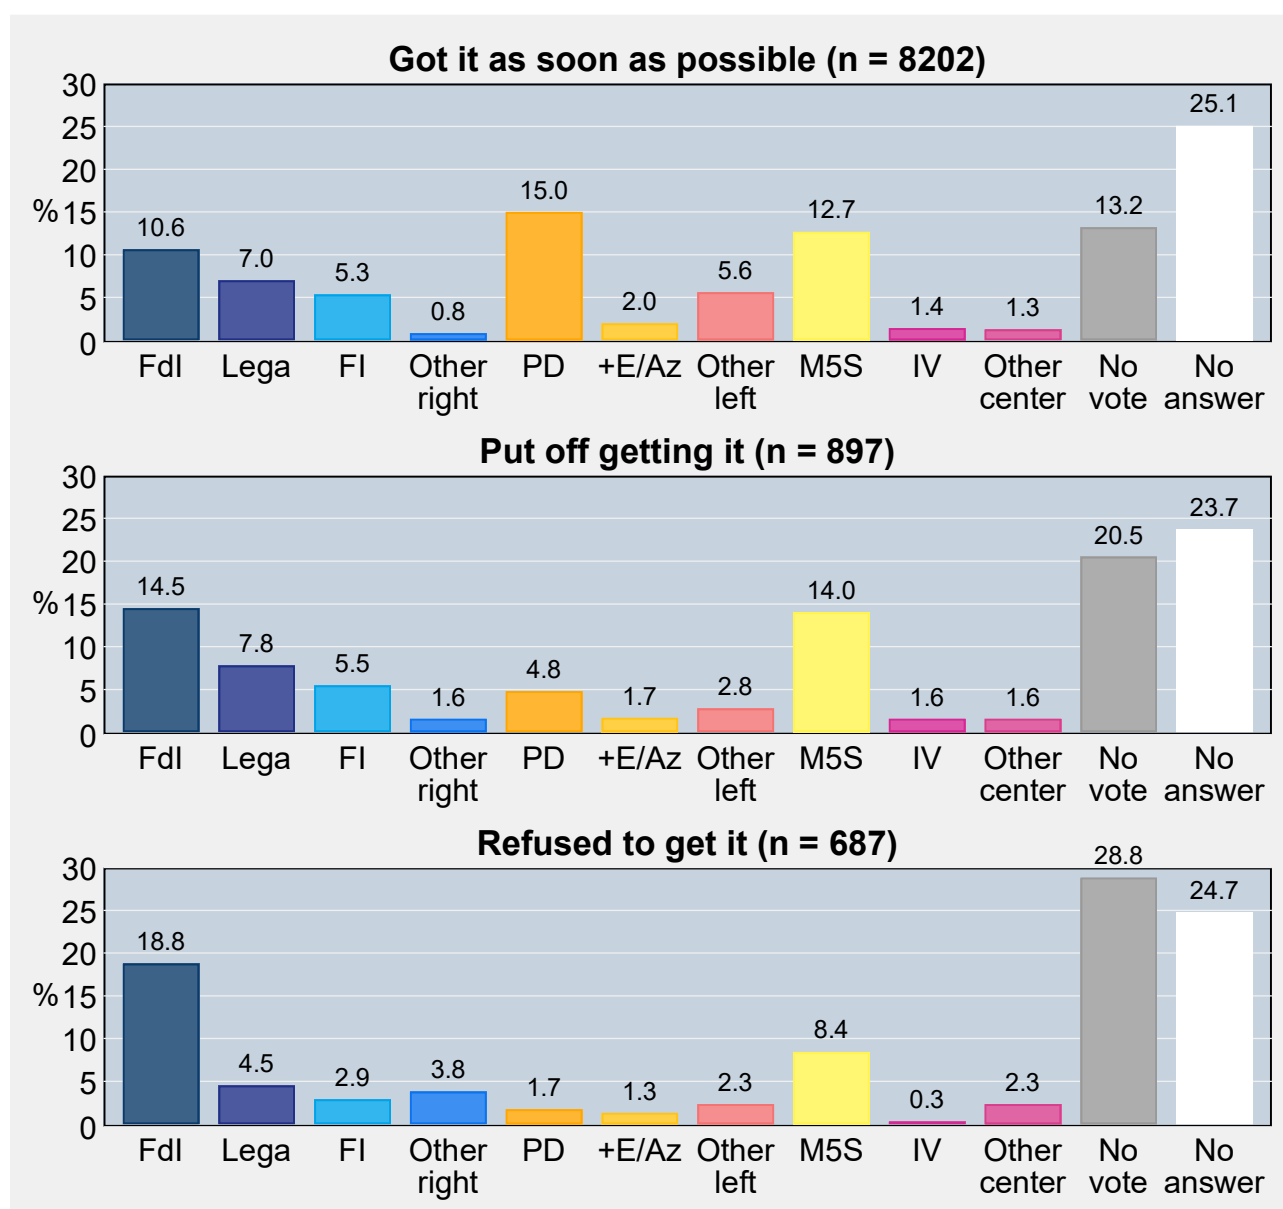

Notes: Voting intention among vaccine-exempt individuals is not displayed due to small numbers ( $n = 214$ ).

Fdl, Fratelli d'Italia (Brothers of Italy); FI, Forza Italia (Forward Italy); PD, Partito Democratico (Democratic Party); +E, Più Europa (More Europe); Az, Azione (Action); M5S, Movimento 5 Stelle (Five Star Movement); IV, Italia Viva (Italy Alive).
